# Supplementary material for: Measurement of membrane tension of free standing lipid bilayers via laser-induced surface deformation spectroscopy
Source: Royal Society of Chemistry journal article supplement (doi:10.1039/c5sm01264c), 2015-01-01
Supplement: c5sm01264c1.pdf [file c5sm01264c1.pdf]

Electronic Supplementary Information

for

Measurement of Membrane Tension of Free Standing Lipid Bilayers via Laser-Induced  
Surface Deformation Spectroscopy

Tomohiko Takei,<sup>1</sup> Tatsuya Yaguchi,<sup>1</sup> Takuya Fujii,<sup>1</sup> Tomonori Nomoto,<sup>1</sup> Taro Toyota,<sup>2</sup>  
and Masanori Fujinami<sup>1\*</sup>

<sup>1</sup> *Department of Applied Chemistry and Biotechnology, Chiba University, 1-33 Yayoi,  
Inage, Chiba 263-8522, Japan*

<sup>2</sup> *Department of Basic Science, The University of Tokyo, 3-8-1 Komaba, Meguro, Tokyo  
153-8902, Japan*

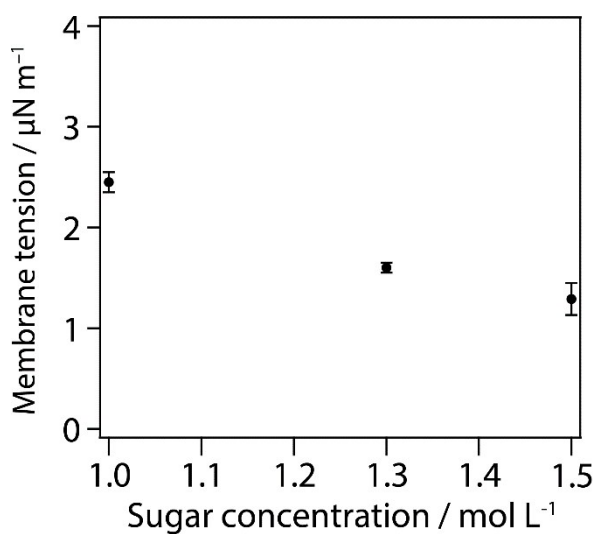

Figure S1. Dependence of membrane tension of BLMs composed of PC and PE without cholesterol on sugar concentration in two aqueous phases.
